# Supplementary material for: Theoretical Insights into High-Tc Superconductivity of Structurally Ordered YThH18: A First-Principles Study
Source: PubMed Central journal article supplement — ACS Omega. 2024 Dec 1;9(50):49470–9. doi: 10.1021/acsomega.4c07199 (PMC11656362; doi:10.1021/acsomega.4c07199), 2024-12-01
Supplement: ao4c07199_si_001.pdf [file ao4c07199_si_001.pdf]

# Supporting Information

## Theoretical Insights into High- $T_c$ Superconductivity of Structurally Ordered YThH<sub>18</sub>: A First-Principles Study

Abdul Ghaffar,<sup>\*,†</sup> Peng Song,<sup>‡</sup> Ryo Maezono,<sup>¶</sup> and Kenta Hongo<sup>\*,§</sup>

<sup>†</sup>*School of Information Science, JAIST, 1-1 Asahidai, Nomi, 923-1211, Ishikawa, Japan*<sup>a</sup>

<sup>‡</sup>*School of Information Science, JAIST, 1-1 Asahidai, Nomi, 923-1211, Ishikawa, Japan*<sup>b</sup>

<sup>¶</sup>*School of Information Science, JAIST, 1-1 Asahidai, Nomi, 923-1211, Ishikawa, Japan*

<sup>§</sup>*Research Center for Advanced Computing Infrastructure, JAIST, 1-1 Asahidai, Nomi, 923-1211,  
Ishikawa, Japan*

E-mail: mwkabd2101@icloud.com; kenta\_hongo@icloud.com

---

<sup>a</sup>Current Address: Materials Science and Technology Division, Oak Ridge National Laboratory, Oak Ridge, Tennessee 37831-2008, United States

<sup>b</sup>Current address: Institute of Multidisciplinary Research for Advanced Materials, Tohoku University, 2-1-1 Katahira, Aoba-ku, Sendai, Miyagi 980-8577, Japan

Table S1: Crystal structures of Y-Th-H predicted at each pressure ( $P$ ). Lattice parameters ( $a$ ,  $b$  and  $c$ ) are given in unit of Å.

---

| Compound | Space group | $P$ (GPa) | Lattice parameters | Atomic coordinates (fractional) |
|----------|-------------|-----------|--------------------|---------------------------------|
|----------|-------------|-----------|--------------------|---------------------------------|

---

Continued on next page

---

**Table S1 – continued from previous page**

| Compound                         | Space group  | $P$ (GPa) | Lattice parameters     | Atomic coordinates (fractional) |          |          |          |
|----------------------------------|--------------|-----------|------------------------|---------------------------------|----------|----------|----------|
|                                  |              |           |                        | Atoms                           | $x$      | $y$      | $z$      |
| YThH <sub>8</sub>                | $P4/mmm$     | 200       | $a = 2.71221$          | Y(1b)                           | -0.00000 | 0.00000  | 0.50000  |
|                                  |              |           | $b = 2.71221$          | Th(1c)                          | 0.50000  | 0.50000  | -0.00000 |
|                                  |              |           | $c = 5.52173$          | H(4i)                           | -0.00000 | 0.50000  | 0.26329  |
|                                  |              |           | $\alpha = 90.0^\circ$  | H(2g)                           | 0.00000  | 0.00000  | 0.14890  |
|                                  |              |           | $\beta = 90.0^\circ$   | H(2h)                           | 0.50000  | 0.50000  | 0.37151  |
|                                  |              |           | $\gamma = 90.0^\circ$  |                                 |          |          |          |
| Y <sub>2</sub> ThH <sub>12</sub> | $I4/mmm$     | 200       | $a = 2.69993$          | Y(2e)                           | 0.829360 | 0.829360 | 0.341270 |
|                                  |              |           | $b = 2.69993$          | Th(1b)                          | 0.500000 | 0.500000 | 0.000000 |
|                                  |              |           | $c = 8.35315$          | H(4g)                           | 0.910710 | 0.410710 | 0.178580 |
|                                  |              |           | $\alpha = 80.7^\circ$  | H(2e)                           | 0.948380 | 0.948380 | 0.103240 |
|                                  |              |           | $\beta = 80.7^\circ$   | H(2e)                           | 0.713000 | 0.713000 | 0.574010 |
|                                  |              |           | $\gamma = 90.0^\circ$  | H(2e)                           | 0.625680 | 0.625680 | 0.748630 |
|                                  |              |           |                        | H(2d)                           | 0.750000 | 0.250000 | 0.500000 |
| YThH <sub>18</sub>               | $P\bar{6}m2$ | 200       | $a = 3.52410$          | Y(1e)                           | 1.000000 | 0.000000 | 0.000000 |
|                                  |              |           | $b = 3.52410$          | Th(1d)                          | 0.666670 | 0.333330 | 0.500000 |
|                                  |              |           | $c = 5.20468$          | H(6n)                           | 0.022580 | 0.511290 | 0.172700 |
|                                  |              |           | $\alpha = 90.0^\circ$  | H(6n)                           | 0.181690 | 0.363370 | 0.305830 |
|                                  |              |           | $\beta = 90.0^\circ$   | H(2i)                           | 0.000000 | 1.000000 | 0.397400 |
|                                  |              |           | $\gamma = 120.0^\circ$ | H(2h)                           | 0.666670 | 0.333330 | 0.110920 |
|                                  |              |           |                        | H(1a)                           | 0.333330 | 0.666670 | 0.000000 |
|                                  |              |           |                        | H(1b)                           | 0.333330 | 0.666670 | 0.500000 |

Continued on next page

**Table S1 – continued from previous page**

| Compound                         | Space group | $P$ (GPa) | Lattice parameters    | Atomic coordinates (fractional) |          |          |          |
|----------------------------------|-------------|-----------|-----------------------|---------------------------------|----------|----------|----------|
|                                  |             |           |                       | Atoms                           | $x$      | $y$      | $z$      |
| YThH <sub>8</sub>                | $P4/mmm$    | 300       | $a = 2.57068$         | Y(1b)                           | 0.00000  | 0.00000  | 0.50000  |
|                                  |             |           | $b = 2.57068$         | Th(1c)                          | 0.50000  | 0.50000  | 0.00000  |
|                                  |             |           | $c = 5.40869$         | H(4i)                           | 0.00000  | 0.50000  | 0.26272  |
|                                  |             |           | $\alpha = 90.0^\circ$ | H(2g)                           | -0.00000 | 0.00000  | 0.15549  |
|                                  |             |           | $\beta = 90.0^\circ$  | H(2h)                           | 0.50000  | 0.50000  | 0.36811  |
|                                  |             |           | $\gamma = 90.0^\circ$ |                                 |          |          |          |
| Y <sub>2</sub> ThH <sub>12</sub> | $I4/mmm$    | 300       | $a = 2.56013$         | Y(2e)                           | 0.829050 | 0.829050 | 0.341700 |
|                                  |             |           | $b = 2.56013$         | Th(1b)                          | 0.500000 | 0.500000 | 1.000000 |
|                                  |             |           | $c = 8.17191$         | H(4g)                           | 0.911260 | 0.410080 | 0.178960 |
|                                  |             |           | $\alpha = 81.0^\circ$ | H(2e)                           | 0.946170 | 0.946170 | 0.107740 |
|                                  |             |           | $\beta = 81.0^\circ$  | H(2e)                           | 0.713880 | 0.713880 | 0.572580 |
|                                  |             |           | $\gamma = 89.7^\circ$ | H(2e)                           | 0.624740 | 0.624740 | 0.750800 |
|                                  |             |           |                       | H(2d)                           | 0.749790 | 0.250210 | 0.500000 |

(a)  $P4/mmm$ -YThH<sub>8</sub> at 200GPa

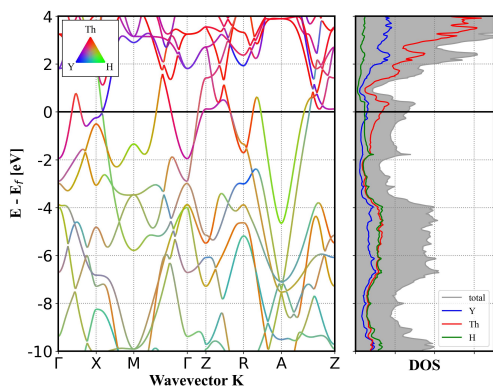

(b)  $I4/mmm$ -Y<sub>2</sub>ThH<sub>12</sub> at 200GPa

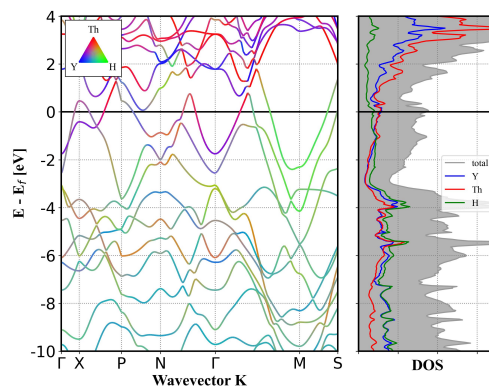

(c)  $P\bar{6}m2$ -YThH<sub>18</sub> at 200GPa

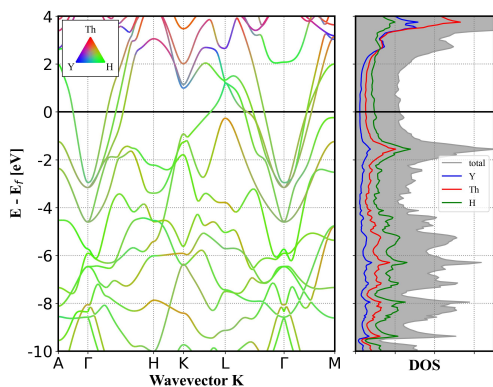

(d)  $P4/mmm$ -YThH<sub>8</sub> at 300GPa

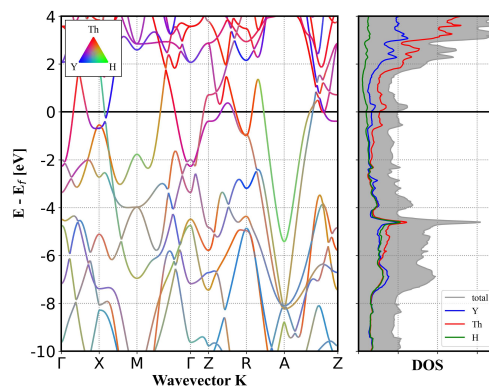

(e)  $I4/mmm$ -Y<sub>2</sub>ThH<sub>12</sub> at 300GPa

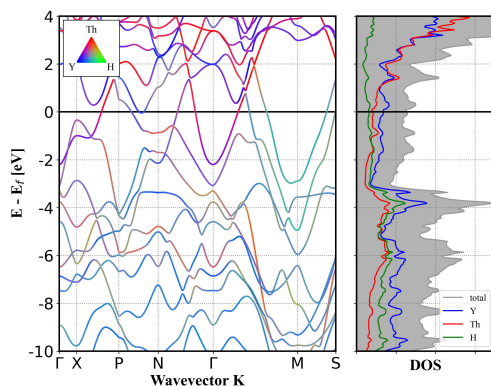

Figure S1: Electronic band structure together with projected density of states (PDOS) for all the stable structures.

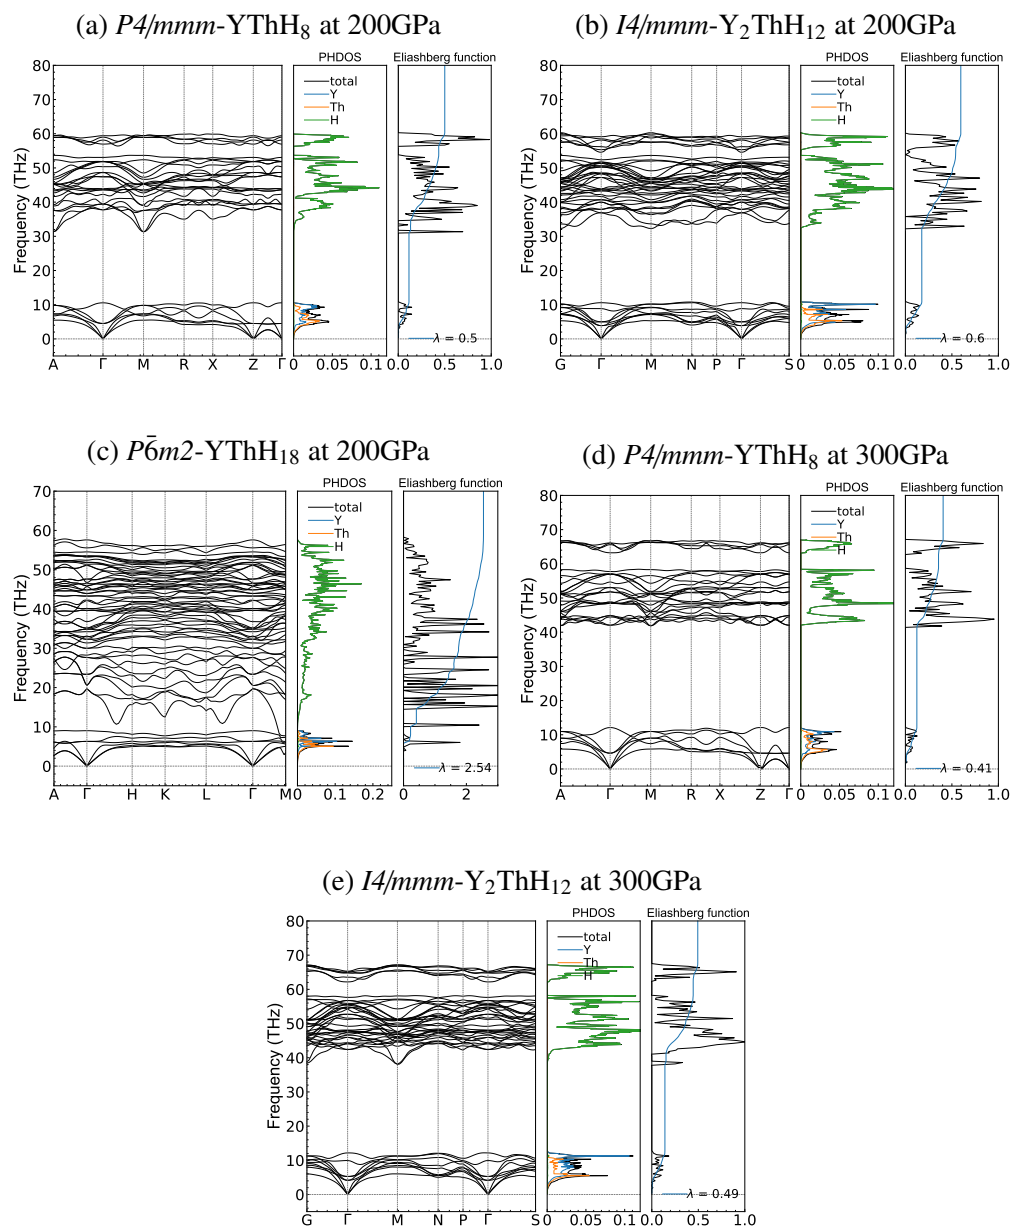

Figure S2: Phonon dispersion, projected phonon density of states (PHDOS), and Eliashberg spectral function  $\alpha^2F(\omega)$  associated with electron-phonon integral ( $\lambda(\omega)$ ) for all the stable compounds. No imaginary modes suggest that all the structure in addition to their thermodynamic stability are dynamically stable.

# Workflow for Novel Pressurized Superconducting Ternary Hydride Discovery and $T_c$ Calculation

## 1. Set Up Problem Definition

- **Select Elements (Y-Th-H):** Choose the ternary hydride system (Y-Th-H) based on literature, known properties, and/or chemical intuition.
- **Define Pressure Conditions:** Specify the pressure range under which the hydride is expected to form, as high pressures often stabilize hydrogen-rich phases based on earlier work.

## 2. Evolutionary Algorithm (EA) Search for Stable Structures

- **Use of Evolutionary Algorithm (e.g., USPEX, CALYPSO):**
  - **Step 1: Generate Initial Population:** Start with random crystal structures in the desired composition system under the target pressure.
  - **Step 2: Energy and Structural Relaxation:** For each generated structure, perform initial energy minimization and structural relaxation using density functional theory (DFT) (e.g., with VASP or Quantum ESPRESSO).
  - **Step 3: Fitness Evaluation:** Rank structures by their formation energy (from DFT) and select the lowest energy structures for reproduction (crossover and mutation).
  - **Step 4: Iterative Evolution:** Continue the evolutionary search over several generations, with DFT energy and force evaluations guiding the algorithm to find the most stable structures.

## 3. Structure Optimization and Stability Check

- **Phonon Calculations (e.g., Using DFT or DFPT):**

- Perform phonon dispersion calculations to check the dynamical stability of the discovered hydrides. Dynamical stability is confirmed if there are no imaginary phonon frequencies across the Brillouin zone.

- **Convex Hull Analysis:**

- Calculate the formation enthalpy of the ternary hydride relative to binary phases and elemental components. Check if the structure lies on the convex hull to confirm its thermodynamic stability.

#### 4. Electron-Phonon Coupling (EPC) and Eliashberg Function

- **Electron-Phonon Coupling Calculation (e.g., Quantum ESPRESSO with EPW):**

- **Step 1: DFT Ground State:** Calculate the electronic ground state using DFT with a high k-point mesh.
- **Step 2: Phonon Dispersion:** Perform detailed phonon calculations using density functional perturbation theory (DFPT).
- **Step 3: EPC Matrix Elements:** Calculate the electron-phonon coupling matrix elements for the system.
- **Step 4: Eliashberg Function  $\alpha^2F(\omega)$ :** Use the EPC data to compute the Eliashberg spectral function  $\alpha^2F(\omega)$ , which provides insights into the strength of the electron-phonon interaction.

#### 5. Superconducting Transition Temperature ( $T_c$ ) Calculation

- **McMillan-Allen-Dynes Formula:**

- Estimate the superconducting transition temperature  $T_c$  using the McMillan-Allen-Dynes formula:

$$T_c = \frac{\omega_{\log}}{1.2} \exp\left(\frac{-1.04(1 + \lambda)}{\lambda - \mu^*(1 + 0.62\lambda)}\right)$$

where:

- \*  $\omega_{\log}$ : Logarithmic average phonon frequency
- \*  $\lambda$ : EPC constant
- \*  $\mu^*$ : Coulomb pseudopotential (typically 0.1-0.13 for hydrides)
